# Supplementary material for: Al3+-Induced growth of α-Co(OH)2nanoplates as high-capacity supercapacitors and water oxidation electrocatalysts
Source: Royal Society of Chemistry journal article supplement (doi:10.1039/c6ra26160d), 2017-01-01
Supplement: c6ra26160d1.pdf [file c6ra26160d1.pdf]

## Electronic Supplementary Information (ESI)

### **Al<sup>3+</sup> inducing growth of $\alpha$ -Co(OH)<sub>2</sub> nanoplates as high capacity supercapacitors and water oxidation electrocatalyst**

Rongmei Liu,<sup>\*a</sup> Zixiang Jiang,<sup>a</sup> Juping Ma,<sup>a</sup> Lu Ni,<sup>a</sup> Xueying Sun,<sup>a</sup> Yong Liu,<sup>a</sup> Haixing Chen<sup>a</sup> and Qi Liu<sup>b</sup>

<sup>a</sup> College of Biological and Chemical Engineering, Anhui Polytechnic University, Wuhu Anhui 241000, P. R. China,

Fax: +86 553 2871 255; Tel: +86 553 2871 255

E-mail: [liurongmei@ahpu.edu.cn](mailto:liurongmei@ahpu.edu.cn)

<sup>b</sup> College of Materials Science and Engineering, Anhui Polytechnic University, Wuhu, Anhui 241000, P. R. China.

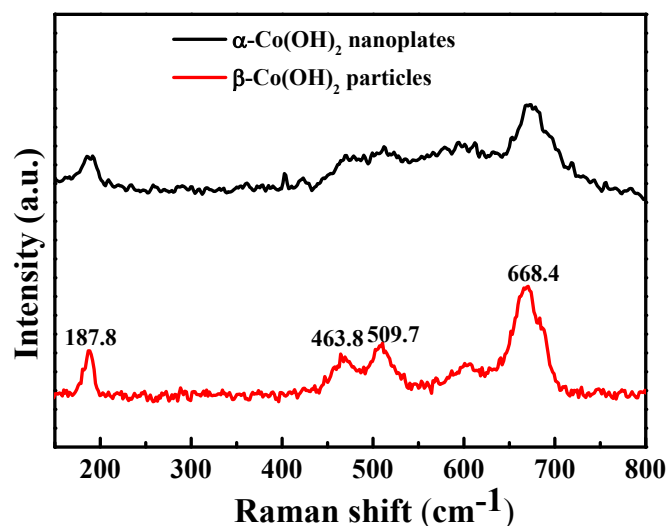

Fig. S1 Raman spectroscopy for the samples.

Figure S1 shows the Raman spectrum of the  $\alpha$ -Co(OH)<sub>2</sub> nanoplates and  $\beta$ -Co(OH)<sub>2</sub> particles, which would provide additional insights into the chemical composition of the samples. All the Raman peaks at 187.8, 463.8, 509.7 and 668.4 cm<sup>-1</sup> can be assigned to the characteristic E<sub>g</sub>(T), A<sub>1g</sub>(T), A<sub>2u</sub>(T) and E<sub>g</sub>(R) modes of the hexagonal brucite-like Co(OH)<sub>2</sub>, respectively.<sup>[1,2]</sup> When introduced Al<sup>3+</sup> ions into the reaction system, Al<sup>3+</sup> ions partly substitute the position of Co<sup>2+</sup> ions and form layer  $\alpha$ -Co(OH)<sub>2</sub> nanoplates, the Raman modes of  $\alpha$ -Co(OH)<sub>2</sub>

nanoplates broaden compared with that of the  $\beta$ -Co(OH)<sub>2</sub> particles. This behavior could be attributed to attributed to vacancies, structural defects and chemical impurities.<sup>[1,3]</sup>

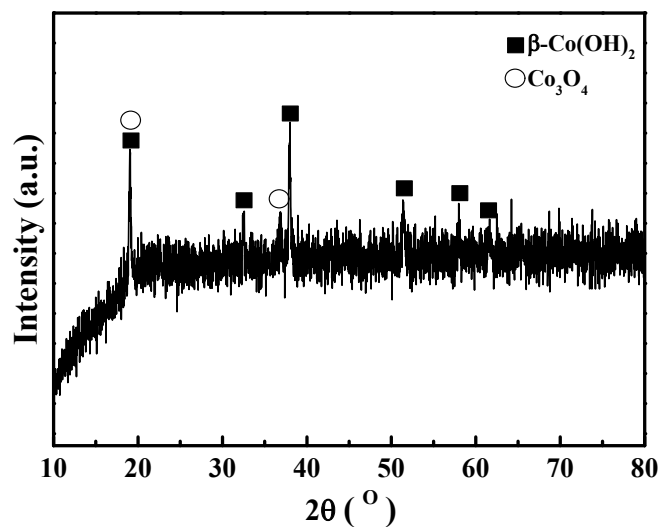

Fig. S2 XRD pattern of the sample controlled by NaCl.

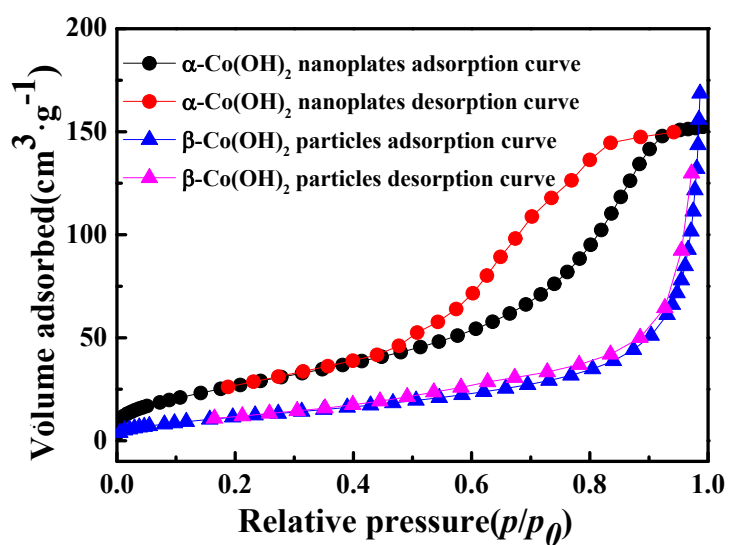

Fig. S3 Nitrogen adsorption-desorption isotherms of the samples.

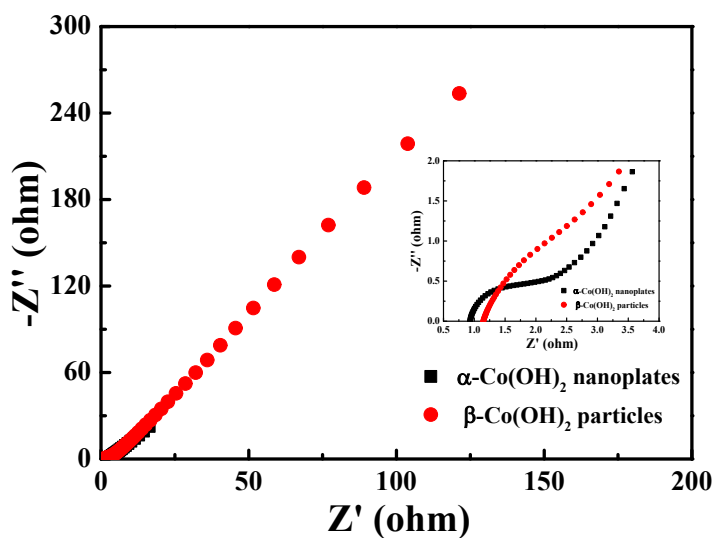

Fig. S4 Electrochemical impedance spectra of  $\alpha$ -Co(OH)<sub>2</sub> nanoplates and  $\beta$ -Co(OH)<sub>2</sub> particles for supercapacitor.

Table S1. The OER activities of different samples in 1M KOH

| sample                                   | Onset potential (V vs. RHE) | $\eta$ at 10 mA·cm <sup>-2</sup> [mV] | Mass activity at $\eta=348$ mV (A/g) | Tafel slope [mV/dec] |
|------------------------------------------|-----------------------------|---------------------------------------|--------------------------------------|----------------------|
| $\alpha$ -Co(OH) <sub>2</sub> nanoplates | 1.51                        | 348                                   | 28.2                                 | 151.8                |
| $\beta$ -Co(OH) <sub>2</sub> particles   | 1.59                        | 449                                   | 0.2                                  | 95.6                 |

## References

- 1 S. R. Shieh, T. S. Duffy, *Phys. Rev. B*, 2002, **66**, 134301-134308.
- 2 S. Gao, Y. F. Sun, F. C. Lei, L. Liang, J. W. Liu, W. T. Bi, B. C. Pan, Y. Xie, *Angew. Chem. Int. Ed.*, 2014, **53**, 12789-12793.
- 3 M.C. Bernard, R. Cortes, M. Keddad, H. Takenouti, P. Bernard, S. Senyari, *J. Power Sources*, 1996, **63**, 247-254.
